# Supplementary material
Source: MDPI journal article supplement (https://www.mdpi.com/1999-4907/7/5/108)

Supplementary material: Localization of the research area and scheme of the distribution of research plots

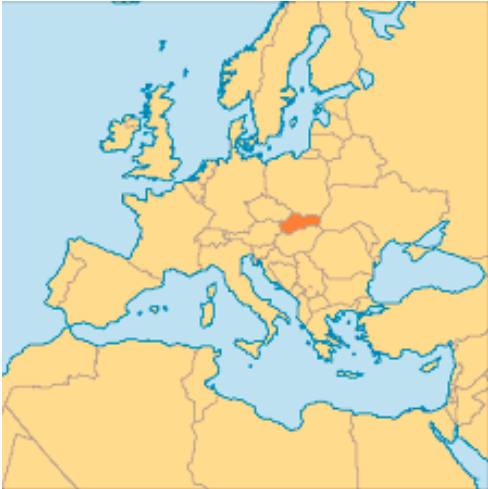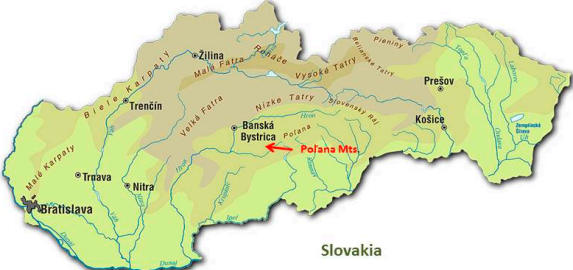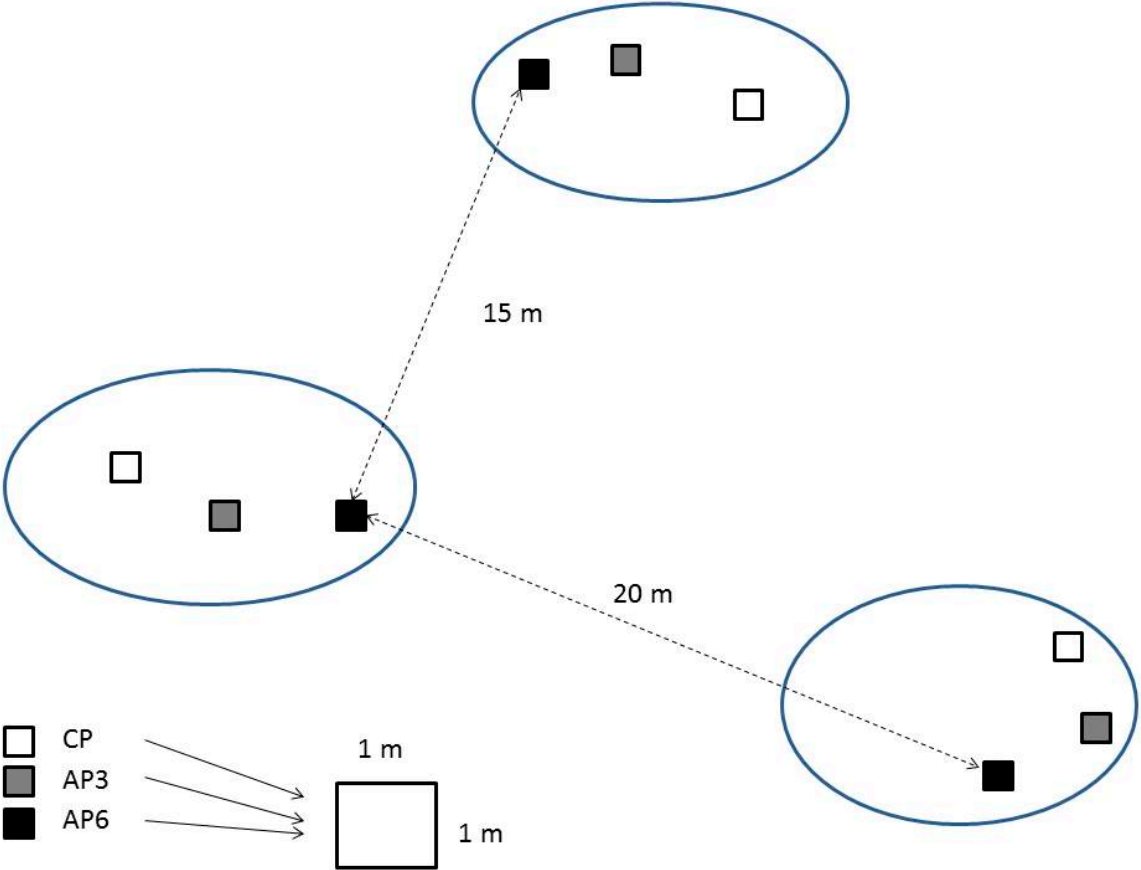

Supplement: s1 [file s1]
